# Supplementary material for: The Effect of Social Parasitism by Polyergus breviceps on the Nestmate Recognition System of Its Host, Formica altipetens
Source: PLoS One. 2016 Feb 3;11(2):e0147498. doi: 10.1371/journal.pone.0147498 (PMC4740506; doi:10.1371/journal.pone.0147498)
Supplement: S1 Table — (XLSX) [file pone.0147498.s004.xlsx]

## Sheet: Sheet1
Colony ID	Species	GPS coordinates
P1	Polyergus	33.8626	-109.22
P2	Polyergus	33.8621	-109.217
P3	Polyergus	33.8625	-109.218
P4	Polyergus	33.8618	-109.218
P5	Polyergus	33.8626	-109.217
P6	Polyergus	33.8614	-109.224
P7	Polyergus	33.8608	-109.221
P8	Polyergus	33.8606	-109.219
P9	Polyergus	33.8616	-109.222
P10	Polyergus	33.8612	-109.222
F1	Formica	33.8625	-109.219
F2	Formica	33.8622	-109.217
F4	Formica	33.8619	-109.218
F5	Formica	33.8623	-109.218
F6	Formica	33.8625	-109.216
F11	Formica	33.8615	-109.222
F12	Formica	33.8611	109.222
3-4B_F3*	Formica	33.8625	-109.219
3-4A_F3*	Formica	33.8614	-109.224
3-4A_F5*	Formica	33.8615	-109.224
	Polyergus colonies have enslaved F. altipetens
	Colonies indicated as "Formica" are free-living
	* colonies collected in 2008. All other colonies collected in 2009.
