# Supplementary material for: The Effect of Social Parasitism by Polyergus breviceps on the Nestmate Recognition System of Its Host, Formica altipetens
Source: PLoS One. 2016 Feb 3;11(2):e0147498. doi: 10.1371/journal.pone.0147498 (PMC4740506; doi:10.1371/journal.pone.0147498)
Supplement: S2 Dataset — (XLS) [file pone.0147498.s006.xls]

## Sheet: Raw peak areas
	A1	A2	A3	A4	A5	A6	A7	A8	A9	A10	A11	A12	A13	A14	Year	Patch	Colony	EnsFree
P01_05	272406	209649	4245045	1150630	2656456	4906067	737867	11223679	397132	1662215	30444878	7948082	1299062	1924441	2009	3.4B	P01	E
P01_06	370759	294228	1910111	552871	2247942	6433711	827763	2721824	607649	1364914	33857765	1025840	595359	611973	2009	3.4B	P01	E
P01_07	471696	272191	5019074	908970	2208131	5780952	706907	8400894	489134	1252451	30040600	5551300	1190839	1305059	2009	3.4B	P01	E
P01_08	104464	84006	1176638	351897	1104727	3645982	468967	2549149	331046	722109	20639437	2452905	518375	697500	2009	3.4B	P01	E
P01_09	330564	546633	1970260	846656	1644467	4927637	584049	3043305	429472	1104419	26087802	2136024	1044406	704832	2009	3.4B	P01	E
P01_10	132940	73272	1220338	423389	699158	2337520	325474	3241451	169557	500076	14162373	3348415	637129	1061896	2009	3.4B	P01	E
P01_12	210269	148871	1420387	269969	994860	3423523	598717	2555027	577599	1015000	23764321	974513	244846	205923	2009	3.4B	P01	E
P01_13	90992	49859	519492	180052	293408	1513107	212608	1061839	95026	143999	9760087	854236	272681	198335	2009	3.4B	P01	E
P01_14	342982	414917	2600464	646660	3497123	9639602	1234887	3730083	1044657	2207311	49719705	2050645	1699400	439974	2009	3.4B	P01	E
P01_15	364454	193691	4059171	796472	2426444	9235836	1261712	9151967	557725	1883682	48352532	9324920	1446436	2524587	2009	3.4B	P01	E
P01_16	183701	220502	1433102	271565	1023571	4248633	529521	2160877	261991	695500	23339970	2196840	744920	607811	2009	3.4B	P01	E
P01_17	589962	531920	6901242	1561197	5408115	15111369	2036691	14270781	1359608	3311379	81000853	14310572	3618642	3518590	2009	3.4B	P01	E
P01_18	1350899	2164034	12834322	2139705	18591107	44486730	6529342	15925950	6152834	11001740	206529553	9804265	9925954	2085358	2009	3.4B	P01	E
P02_05	174177	124104	2455773	586087	2654498	3855462	908504	5488416	148916	592154	24432858	4096166	1051857	1084899	2009	3.4B	P02	E
P02_06	90938	39448	1361466	186344	557534	958650	251581	4313538	98235	280473	6697085	3613664	283703	900795	2009	3.4B	P02	E
P02_07	163913	171408	1350280	293689	3026408	4604893	1097727	1841989	354078	905746	28797546	848597	1262948	193133	2009	3.4B	P02	E
P02_08	134050	112644	1045194	390440	1689430	3096689	725674	2046213	320945	222785	18503775	1426144	689696	374888	2009	3.4B	P02	E
P02_09	302611	284410	2356748	852337	3890303	4920670	1244397	4307117	358330	1570526	32844209	3643662	2030600	1283072	2009	3.4B	P02	E
P02_10	297872	317605	2501617	727672	4438350	6176790	1592110	4400613	738015	541477	39125486	2830127	1725322	976371	2009	3.4B	P02	E
P02_11	374616	376003	3431653	1364754	7015074	9050071	1880909	6890856	594415	516023	51728848	4666936	2784713	1298202	2009	3.4B	P02	E
P02_12	284447	123523	3011405	751528	1436166	3033036	804999	6894306	308681	649353	19526188	4892349	554466	1057821	2009	3.4B	P02	E
P02_13	364304	374105	4593221	1589987	4873674	4716364	1441800	12135012	922219	2442989	30626536	7951263	1411567	2388801	2009	3.4B	P02	E
P02_14	345045	232190	3240093	795243	4543015	6565379	1837192	7366195	302457	552714	40833118	7315338	1502021	2606325	2009	3.4B	P02	E
P02_15	544393	273882	10275597	2449609	6559964	6848478	2083337	23841652	82768	2349121	47076642	18658333	2435463	4582119	2009	3.4B	P02	E
P02_16	359613	355578	3415827	552145	7072646	11600008	2890702	5083905	630651	1433509	65911377	3086198	2377770	1045149	2009	3.4B	P02	E
P02_17	507829	273208	6577135	1816852	4188498	5834490	1479729	16828617	287802	1934215	34020074	10754261	1639617	3041013	2009	3.4B	P02	E
P02_18	378902	257012	2889951	733301	4699143	6498514	1873621	4588635	337107	1588713	42636267	3963008	1066192	1311841	2009	3.4B	P02	E
P02_19	712802	558764	4492897	883181	11251673	16731112	4035667	6011667	1009928	1783105	83753480	4104275	3028156	1049144	2009	3.4B	P02	E
P03_05	184252	193884	1229161	214594	1038097	3883835	731313	1569983	500163	827789	25468141	1238214	1028638	264871	2009	3.4B	P03	E
P03_06	229940	84614	1814712	282884	744595	2748243	639811	2698722	249311	366451	16764641	1897867	381792	408458	2009	3.4B	P03	E
P03_07	205886	190018	1336792	238590	1073498	3720629	689483	1453451	346361	372796	22955393	1516569	958026	269678	2009	3.4B	P03	E
P03_08	183242	190851	1279661	250736	827122	3823705	575841	1827473	366481	670890	22551920	1463332	837328	393224	2009	3.4B	P03	E
P03_09	920575	970361	7077726	1062587	5721042	14990952	2680033	9541664	1916480	3623032	82915783	8035077	3719627	2096042	2009	3.4B	P03	E
P03_10	733172	754607	3600585	828010	3709814	9853958	1594808	4480193	1638184	2626266	54404958	2739497	3030672	723046	2009	3.4B	P03	E
P03_11	181405	98535	2014518	546823	1232960	2162830	499381	3793048	462014	955042	14793032	2786662	612289	530787	2009	3.4B	P03	E
P03_12	890683	275014	11469729	2104140	1708182	5619526	1002850	23053167	866084	1850245	32793626	16284971	1185422	4182800	2009	3.4B	P03	E
P03_13	623144	353470	3496339	550127	2118847	7881066	1398659	4141861	1180847	1676190	42957508	2279997	1374899	577726	2009	3.4B	P03	E
P03_14	407270	253731	2409733	514406	1780695	5924350	1041650	3092275	495582	1316219	35886959	2834655	1536088	662557	2009	3.4B	P03	E
P03_15	198557	114622	1490279	250032	730999	3238926	639967	2244686	202225	546490	20518932	1960540	369638	479686	2009	3.4B	P03	E
P03_16	874821	802321	6061067	1190277	7023798	16397462	3129285	7141498	2377746	4331304	89086338	3044282	4402479	718187	2009	3.4B	P03	E
P03_17	439310	432345	3375973	848256	2675424	7172908	1114555	5728002	659670	1724901	43680334	3662985	1749330	726408	2009	3.4B	P03	E
P03_18	218660	131215	1539156	537659	1410142	3484471	662432	3079684	299253	1174588	22931292	1518513	537121	242048	2009	3.4B	P03	E
P03_19	937276	900490	5923473	1692405	6883983	15226253	2342742	8470166	909749	4706734	76326362	4332025	2781554	843961	2009	3.4B	P03	E
P04_06	237453	82016	1549815	440670	859219	2465089	538028	3319741	149373	556426	13188561	2265079	294121	565117	2009	3.4B	P04	E
P04_07	376908	305218	3112334	936065	3246997	7982567	1522672	6113734	935142	2238943	42324033	4346864	1204575	1635735	2009	3.4B	P04	E
P04_08	549218	557998	3284262	810417	4008807	11692090	2021939	5032196	1340713	2924621	58293382	2146212	1882752	401685	2009	3.4B	P04	E
P04_09	772006	509439	5037921	1215262	6384835	13206144	2577929	8088933	1767089	3848394	66354400	4747611	2068279	1382630	2009	3.4B	P04	E
P04_10	373162	148748	2592296	594488	1928562	4631075	1007919	5660093	144511	1306132	24671205	3137649	810660	699374	2009	3.4B	P04	E
P04_11	679813	526288	4297475	1585679	5657660	11840987	2160576	8490079	1419875	3289894	57845007	5057924	2705131	2080374	2009	3.4B	P04	E
P04_12	452539	444832	4015389	1409721	4106819	10823590	1998418	7833154	2104509	2764011	53229573	3456796	1505581	800555	2009	3.4B	P04	E
P04_13	476061	228162	2401909	904140	1737604	4979283	976615	4901493	916030	1581243	25395424	3184364	502910	779250	2009	3.4B	P04	E
P04_14	1214042	1102438	8516427	1552610	11530924	28154041	6536600	10618276	4760851	7214345	144047414	4532979	4562004	1166974	2009	3.4B	P04	E
P04_15	931392	820034	6898852	1214341	8423762	23552346	4428546	9590635	2481226	5664109	115307859	6888087	3543102	2064030	2009	3.4B	P04	E
P04_16	1091248	1255916	9644595	4648361	13209232	23454854	4941563	21619222	830824	6864705	112659927	8491485	3952615	1790032	2009	3.4B	P04	E
P04_17	563974	376947	3960626	779414	4115057	13941515	2741189	4925625	1247902	3104976	65449339	2612551	1676222	711919	2009	3.4B	P04	E
P04_18	815751	544038	3971074	681893	4546676	14682473	2418502	4438664	1521098	2958039	66493352	2511252	1584453	887339	2009	3.4B	P04	E
P04_19	1092142	746390	6894379	3284081	7500576	16443347	3664635	8120616	607017	5869107	91548932	5723816	2685870	1705000	2009	3.4B	P04	E
P05_05	209140	167930	1438699	312491	1397552	3458618	1022909	2050088	488868	873233	21263331	1605097	741476	433762	2009	3.4B	P05	E
P05_06	411950	289866	2957531	556554	4058719	7751474	1944453	3991980	1249501	2236381	52076463	2309769	2055889	564570	2009	3.4B	P05	E
P05_07	330129	344498	2401555	336424	2593055	7902249	1631351	2658348	1189234	1920608	45075396	1568978	1394572	448404	2009	3.4B	P05	E
P05_08	254236	127587	1652589	313898	1570385	3829532	880742	2288685	537602	651462	26162204	2859059	682995	666884	2009	3.4B	P05	E
P05_09	869282	360663	8710706	1098135	5489028	16718933	4043202	15977915	1395847	3774096	101152932	11750943	2490193	2496104	2009	3.4B	P05	E
P05_10	686377	702061	4618265	1110088	6342693	14551689	2854001	5726233	1879373	3363087	76710544	5405540	4179078	2120008	2009	3.4B	P05	E
P05_11	914781	315243	12315794	2136715	4982060	14311749	3587393	25521933	3111158	3606854	88513784	21343156	2272952	4546087	2009	3.4B	P05	E
P05_12	275777	103130	2291788	285337	1511278	5483681	1303699	3061266	404393	1028554	38535723	2284168	510024	416497	2009	3.4B	P05	E
P05_13	1355930	1024832	9650727	1484044	11039278	23198596	5882890	11608736	2795277	6192229	140894071	6988550	4377114	2041422	2009	3.4B	P05	E
P05_14	811199	568404	5274369	1194473	5812897	11470301	3027865	9186647	1603884	3314418	74176866	11895900	3236214	5086868	2009	3.4B	P05	E
P05_15	1464805	1346497	9072597	2716492	12573743	20957272	5376883	14509612	3842879	6403302	129632680	5481067	5024511	1547502	2009	3.4B	P05	E
P05_16	772924	528280	5200283	1529509	7294907	13272676	3352449	9898249	2769322	3960578	80435830	5998135	3915370	2085836	2009	3.4B	P05	E
P05_17	433026	224217	3789569	1055269	4426518	9096751	1916754	7454133	895779	2319007	55069388	5450343	2055161	1507363	2009	3.4B	P05	E
P05_18	204180	129450	1768116	719617	1967111	4330156	1066905	4528119	348555	1394161	29208299	2941633	703193	969504	2009	3.4B	P05	E
P05_19	732881	349831	8779698	2031955	2908230	5009911	1460661	20414196	264850	2677027	37587787	15309115	1262017	3695947	2009	3.4B	P05	E
P06_05	585672	462913	2410951	1080310	4844651	3966019	1540301	7663114	910521	357148	32597462	4197895	1238525	1069515	2009	3.4A	P06	E
P06_06	575751	403504	5948476	2637585	8363087	7585891	2667654	13418759	358545	6455418	55589541	8559737	1441611	2807324	2009	3.4A	P06	E
P06_07	481661	305915	2051523	512020	5608577	4976402	1837016	4157741	780790	1266413	42094153	3980045	904421	1553183	2009	3.4A	P06	E
P06_08	93110	58591	548450	193650	758874	892452	329092	1121908	151840	296239	7821398	919126	258392	262073	2009	3.4A	P06	E
P06_09	430274	37147	3694763	618338	4419049	5540246	2161440	7671632	424907	491258	43200635	7387258	631763	1924924	2009	3.4A	P06	E
P06_10	295021	120134	1849496	328318	3061266	4991740	1411348	2058374	317694	237845	34576921	1017828	704405	236477	2009	3.4A	P06	E
P06_11	147865	137485	881599	383266	1463144	2334303	709186	1382145	220881	128047	16717879	876021	796903	161696	2009	3.4A	P06	E
P06_12	698427	515701	6123862	2677983	7855209	7479978	2725271	17359159	578382	480691	57858032	14299728	2383362	5847428	2009	3.4A	P06	E
P06_13	485694	270621	2810006	769397	6206042	7079106	2325631	3780100	1476023	479381	48325415	1315594	1427587	392861	2009	3.4A	P06	E
P06_14	1089289	757938	11402695	1973026	19891477	20052334	6294759	17202232	2291353	2316838	138205839	9232331	5194985	2914919	2009	3.4A	P06	E
P06_15	250966	75577	1408841	574901	3119754	3644372	1036595	3010411	415018	2960214	22732430	1659932	632957	885177	2009	3.4A	P06	E
P06_16	981333	675450	11407666	2406951	13198980	13392682	4290084	21514114	1753961	2945808	94478671	18640108	4196377	6068767	2009	3.4A	P06	E
P06_17	818007	819850	5426948	972918	18024753	5714203	5251899	7238957	2048556	1745496	103792382	4620568	4356795	1039920	2009	3.4A	P06	E
P06_18	754571	603044	7339491	1459264	15391791	4636831	4996177	11249738	1789173	2470139	105452006	9485648	3663376	1997567	2009	3.4A	P06	E
P07_05	291252	299397	2054765	528300	5386710	2056405	1518525	3571503	673116	835777	30627517	2914985	1069126	807966	2009	3.4A	P07	E
P07_06	219077	262073	1780349	1378808	3924642	1271167	865458	6200163	355941	1776514	19434809	4778914	632202	1778109	2009	3.4A	P07	E
P07_07	91401	51568	836497	300375	1947349	671968	540686	1806021	289906	161540	12828975	904718	380924	401233	2009	3.4A	P07	E
P07_08	260540	154392	1169407	209370	2313102	1111329	690286	1235876	217327	198859	15587988	764931	449641	214454	2009	3.4A	P07	E
P07_09	395117	242003	2157931	525450	3744075	7280787	1773133	2566864	712176	285375	41479204	950130	951342	359593	2009	3.4A	P07	E
P07_10	697210	164611	2082469	771322	7898579	9854062	2778951	3382281	643620	984244	61382820	2164582	1231574	512074	2009	3.4A	P07	E
P07_11	831941	590231	12577130	2375639	12710984	12721191	3689995	21875999	489473	1541568	68335472	13989508	1837455	3172652	2009	3.4A	P07	E
P07_12	255657	62343	1544721	996654	2954020	2394680	1031600	3758118	230181	123836	21540214	3006769	311656	833057	2009	3.4A	P07	E
P07_13	686120	426767	4594152	2285890	9936951	9842857	3280537	13492210	1008390	3337935	54755108	6959237	1327891	2099413	2009	3.4A	P07	E
P07_14	1712872	1754199	9251239	2293837	16292360	21138957	4206783	12023826	1240200	4669080	75555101	9472996	4118159	1902228	2009	3.4A	P07	E
P07_15	364927	93146	7055463	1309363	1857766	3030367	801820	12499820	338055	271112	17681562	7680461	449568	1657145	2009	3.4A	P07	E
P07_16	147339	87812	1205215	499106	2716383	3490229	823551	2801591	353874	168028	23314467	1443162	854777	231793	2009	3.4A	P07	E
P07_17	640060	917229	3815299	852301	9996341	15430230	3191792	4194423	888524	1821295	64609748	2506264	2767696	564604	2009	3.4A	P07	E
P07_18	838347	715013	5749733	828315	10258359	11665179	3131220	6927737	1285403	2233595	64846313	3550842	2203666	1254237	2009	3.4A	P07	E
P07_19	806820	601827	5625644	1162360	12685510	3617186	3607885	7926322	1615506	2494775	86283337	3688378	1975804	958725	2009	3.4A	P07	E
P08_05	111361	61427	807005	177222	1121797	1603826	465403	1505738	179465	235269	11083530	678698	308571	256471	2009	3.4A	P08	E
P08_06	270211	150892	2289881	563662	3082598	3862033	1223156	3805670	606810	1053608	27893923	1914936	791963	714197	2009	3.4A	P08	E
P08_07	587396	677229	5036667	825115	10355816	13851029	3892835	5942586	2190625	4013971	92712058	2538692	3149306	684639	2009	3.4A	P08	E
P08_08	40893	19796	403988	134251	243442	458771	128760	975677	43583	58709	3361342	457083	136217	164145	2009	3.4A	P08	E
P08_09	185396	62215	2221173	1154834	620825	929538	306598	9172599	487906	168417	6946636	8031238	275624	2094738	2009	3.4A	P08	E
P08_10	576551	208993	7099936	1405331	1898295	5245965	1512991	16045680	926051	1137934	35633871	13818184	901326	3022074	2009	3.4A	P08	E
P08_11	734600	721219	5764564	1033954	11135324	16227756	4458660	7511383	1809910	4156767	92540382	2334258	3739443	762316	2009	3.4A	P08	E
P08_12	868402	571321	6462252	1275304	6729601	12222100	3092891	9850112	787561	2882441	69140765	6431887	2387416	2339197	2009	3.4A	P08	E
P08_13	445136	300161	3420672	728073	4277367	7736281	2187907	5136771	427052	1818922	47266480	1421755	967054	332007	2009	3.4A	P08	E
P08_14	1461276	1272211	11572513	3352385	20729609	29653260	9005012	14986592	4047816	8341223	183945853	7878323	7664076	1886093	2009	3.4A	P08	E
P08_15	300287	185801	4165791	1733897	1217345	1412875	555465	15222987	709394	392267	10545540	12811041	451069	2979230	2009	3.4A	P08	E
P08_16	423391	242727	2928732	773529	5789046	6383032	1670695	4944846	551133	1623581	41107012	3766037	1383210	850342	2009	3.4A	P08	E
P08_17	733767	369990	7976002	1737126	8455153	11035569	3281484	14334288	1884814	1805982	72805512	11546981	2729224	3317185	2009	3.4A	P08	E
P08_18	261783	79520	3537324	510187	1662404	4541962	1573527	7097825	885441	817178	31008726	5571296	453007	1151169	2009	3.4A	P08	E
P08_19	385885	227978	3166771	580631	1785099	5428111	1534202	5040506	627010	829907	32785463	2750774	628559	439065	2009	3.4A	P08	E
P09_05	164625	83299	2380226	458258	3174755	1084304	745299	5050373	351094	296811	23754223	5974127	744799	2303369	2009	3.4A	P09	E
P09_06	350070	229682	2413919	1159608	5953804	1306299	1350501	5124461	598505	917673	30412645	4772074	1291772	2210874	2009	3.4A	P09	E
P09_07	117779	56803	1520819	472882	1333873	1428596	300855	4582354	112560	166580	9727680	5015822	484860	1454416	2009	3.4A	P09	E
P09_08	178194	50513	1232130	449587	1861049	2201438	459406	2744952	306707	420212	14842092	2550753	596569	1109966	2009	3.4A	P09	E
P09_09	1039134	940337	17283224	2881612	19159194	23426412	4418241	30134584	3539388	2381703	116667383	17985124	3838762	5434042	2009	3.4A	P09	E
P09_10	830314	371803	12156418	3289595	8045649	7072795	1977064	26310995	99652	516640	52687988	23133964	2315973	6527601	2009	3.4A	P09	E
P09_11	244284	88907	1707934	588046	2934981	986536	617101	2560122	548100	250996	23339322	1673898	789047	530435	2009	3.4A	P09	E
P09_12	679959	512520	5912719	1255706	12379474	13772349	3528788	10185407	1177622	831816	84766140	8269046	2043459	2030429	2009	3.4A	P09	E
P09_13	379739	304034	3461927	1014994	4524805	5461842	1287971	7423008	164612	764207	36529481	7566576	1041718	1997609	2009	3.4A	P09	E
P09_14	232272	81312	2961248	620864	3757294	5142030	1284131	5830758	960822	1176650	33771790	4400351	813874	1071653	2009	3.4A	P09	E
P09_15	577474	543149	3600541	1062532	6529554	6574186	1694238	7759579	413368	1832246	43894127	5594684	1271852	1744344	2009	3.4A	P09	E
P09_16	481565	518041	2915426	538276	6167347	10619915	1779030	3501618	810817	2183922	55726936	2023103	2098853	638196	2009	3.4A	P09	E
P09_17	369752	260458	2604807	367775	4915940	7675231	2285200	2891961	494117	694561	51156669	1383138	1075991	346662	2009	3.4A	P09	E
P09_18	654312	835946	3236498	980265	5103979	10790431	2134052	4137147	490737	2036917	62817849	4162293	1963227	708606	2009	3.4A	P09	E
P09_19	670396	490883	9665986	4357274	11101072	1283171	637649	26766342	2524573	28284619	47392295	19251431	1878368	4054280	2009	3.4A	P09	E
P10_05	437941	382587	3095192	716046	7629925	10258939	2670282	5618186	1852441	2864651	61578194	3995715	2512446	1163106	2009	3.4A	P10	E
P10_06	184710	150564	1289169	235174	2295009	4053823	938197	1801397	406227	320933	26157955	1713922	509042	513751	2009	3.4A	P10	E
P10_07	480461	630475	4336551	677728	6799401	10768966	2544873	5813264	1395050	2640201	62799856	4734278	2385242	872453	2009	3.4A	P10	E
P10_08	565300	693743	4101970	874424	9327946	13876819	3764815	6918179	2525693	1147033	82031420	5127392	3142379	1757575	2009	3.4A	P10	E
P10_09	797257	593247	4153950	1374496	7234349	11684277	3116688	7519687	1235181	2857161	67414737	5885727	2915074	2196981	2009	3.4A	P10	E
P10_10	991982	1045990	6973193	2390414	15774836	22122923	6396672	11227848	5106425	2136451	131993763	5564982	4761605	1764525	2009	3.4A	P10	E
P10_11	418470	491469	2457018	668119	6945542	10465369	2442326	3679458	1229412	2699166	53512966	2832035	2204497	655624	2009	3.4A	P10	E
P10_12	266431	242603	1472888	352000	2028191	4542650	1151978	2242577	370460	898226	26590633	2323371	404391	460970	2009	3.4A	P10	E
P10_13	784969	551494	6125518	1642533	9043675	15831864	4502694	10966085	1412276	1970056	95946264	8332056	2535835	2492516	2009	3.4A	P10	E
P10_14	1179100	1258960	9408399	2031927	17084251	26028064	6525696	14721650	3023563	2175228	136458727	6885857	5483485	2656931	2009	3.4A	P10	E
P10_15	1344382	1473160	11589592	2569050	24132575	31314372	8940306	18011077	4558160	9015726	186572672	11056412	7158751	3239549	2009	3.4A	P10	E
P10_16	298351	144147	2635903	825365	4673083	6540743	2136287	5193034	1731615	586297	45771122	3625850	1557571	1031870	2009	3.4A	P10	E
P10_17	1135140	1866143	7266000	1063512	16631920	25673186	7427026	8294312	3323519	3470705	159479992	5921293	6786606	1881607	2009	3.4A	P10	E
P10_18	451562	528886	2435066	591527	4166814	8636622	2163903	3282875	527224	1780383	50340567	2070885	1279917	639572	2009	3.4A	P10	E
P10_19	658634	645943	7262001	1480820	11587178	17161074	5014416	11101997	1472442	2287607	104662578	7583073	2941120	2595209	2009	3.4A	P10	E
F01_03	23295	9415	440215	44292	152864	504828	77054	1271460	29392	91686	4268929	976085	42870	111536	2009	3.4B	F01	F
F01_04	92822	33572	719129	83146	597915	2117804	364064	1105589	171093	282993	14585364	799101	215456	152602	2009	3.4B	F01	F
F01_05	326132	169012	3122096	450943	3346617	7440901	1410481	5265047	887827	1677983	45310655	4090798	1224892	991615	2009	3.4B	F01	F
F01_06	480915	432408	2886769	450680	4516492	8062328	1390874	4514962	1145483	1675168	46821090	2993502	1835270	927842	2009	3.4B	F01	F
F01_07	653787	612328	4621195	652410	7022664	12081562	2354898	6520450	1838076	2943466	75970757	5211088	2917981	1339897	2009	3.4B	F01	F
F01_08	261852	166393	1915210	294515	2695993	5557228	1066759	2582155	778880	1332232	37909706	2261709	1190423	597578	2009	3.4B	F01	F
F01_09	164843	121454	1435534	216321	1467189	3649629	647620	2337799	459433	744911	24126505	1995976	638796	540854	2009	3.4B	F01	F
F01_10	554204	495528	3274331	412960	5769812	10433878	2060682	3676304	1582412	2623458	65506057	2598378	2530283	820770	2009	3.4B	F01	F
F01_11	539845	413058	3450963	486814	5829164	9532309	1931068	4242084	1582502	2329672	62706569	3313571	2277144	1040010	2009	3.4B	F01	F
F01_12	780016	790952	5124589	739691	10072643	16867077	3630989	6144884	2994494	4228501	103159369	4202132	4567435	1313087	2009	3.4B	F01	F
F01_13	307903	336611	2183641	325440	3436791	7169195	1396569	2661028	1019201	1542496	44559968	2173952	1576276	468228	2009	3.4B	F01	F
F01_14	650389	657947	4190188	549568	8653777	13944219	2874937	4100564	2221164	3557650	90566752	2386499	3481973	570998	2009	3.4B	F01	F
F01_15	430412	289665	2620171	334618	3423992	9051893	1802871	2627068	1393017	1955458	56697078	1561155	1384953	345187	2009	3.4B	F01	F
F01_16	293078	232355	2042096	224430	2364974	6668842	1398471	2356840	1293334	1458475	44399804	1438660	1112517	357535	2009	3.4B	F01	F
F01_17	1076683	1111469	7030425	801636	11395775	20224360	4494811	7489713	3271056	5312321	122920229	4355582	5204789	935407	2009	3.4B	F01	F
F01_18	474849	315463	3492931	752107	5059311	9228117	2076357	6093225	1399538	2779867	61471758	2761031	2177977	615940	2009	3.4B	F01	F
F01_19	528020	357784	4553414	1000967	3982971	6357963	1504662	10072464	826379	2461692	43957554	7415782	1576380	1871644	2009	3.4B	F01	F
F02_01	166022	67923	1417998	101052	2079765	4777383	954679	1427845	332837	472067	30447865	435833	1272108	46217	2009	3.4B	F02	F
F02_03	187615	71762	1763311	291879	2384957	4428831	941259	2418968	397792	274547	27105523	1480196	302715	539003	2009	3.4B	F02	F
F02_04	391716	234148	3261784	630159	4488936	8095787	1759033	5425777	599805	632157	46505455	5018616	1036182	1742310	2009	3.4B	F02	F
F02_05	393926	246204	2895501	477467	5069470	8081667	1665254	3966158	925927	1052254	46668517	3107415	1099641	1178266	2009	3.4B	F02	F
F02_06	602075	343935	3551399	673679	6132609	8699847	1553122	4475161	872881	1032148	49595501	3543895	1181031	1546045	2009	3.4B	F02	F
F02_07	309929	155190	3225828	607015	2142792	3841613	763014	6797590	287271	306890	22882052	6050345	550190	1822725	2009	3.4B	F02	F
F02_08	353273	349089	2026684	287513	3636323	6264048	1197872	2057632	668016	1339562	36655286	1201827	1235874	244051	2009	3.4B	F02	F
F02_09	219816	130829	2266205	498104	2550142	3891948	718966	5038365	376044	914437	23573637	4863990	582766	1320249	2009	3.4B	F02	F
F02_10	259944	64514	3728120	782420	1451946	1759225	401118	8113389	249749	495339	11282086	7494838	285334	2025228	2009	3.4B	F02	F
F02_11	458458	466298	3675460	1597666	8154478	6518516	1368026	9110773	3314188	3036055	36628681	7379730	1589968	2104803	2009	3.4B	F02	F
F02_12	349738	166076	3237848	752133	3146790	4735342	984363	6988431	615961	1247397	28385081	7230851	882970	1957580	2009	3.4B	F02	F
F02_13	117806	38185	705350	210672	1362242	2501758	534195	925473	174893	230661	15589725	542370	174273	236850	2009	3.4B	F02	F
F02_14	327924	113030	3604303	944204	1697246	2971947	615683	8384374	156591	208460	17902934	7039728	537870	2100206	2009	3.4B	F02	F
F02_15	451462	308110	2414260	441451	3816751	7189059	1529257	2462028	587839	491163	40798605	2425471	690082	228581	2009	3.4B	F02	F
F02_16	410189	384781	3114025	1551297	5542518	4819998	1080357	8378857	2198979	2786571	28005002	4471291	632990	1390842	2009	3.4B	F02	F
F02_17	741555	474088	4248328	790482	6907403	11646051	2279922	4347987	943540	2489933	65570603	2856613	1314610	386805	2009	3.4B	F02	F
F02_18	604667	461508	4360578	738824	7183650	12118752	2302466	4759503	1876036	1016836	68037168	2578881	1293888	629622	2009	3.4B	F02	F
F02_19	413178	383982	3029728	1603936	6425441	6455964	1313268	6685838	2617220	3488954	34910698	2838077	1021426	727505	2009	3.4B	F02	F
F04_01	16900	5187	109547	14465	124367	427267	64812	216715	21488	31669	4436521	140941	62076	31657	2009	3.4B	F04	F
F04_03	93221	35399	601296	211452	724243	1976634	393538	1298004	155833	570710	13605345	862535	238817	255544	2009	3.4B	F04	F
F04_04	293685	193401	1916234	707852	3130672	6422451	1169877	3574771	691131	2007466	38360857	1408445	1154863	437334	2009	3.4B	F04	F
F04_05	259099	115852	1435798	308657	1784718	4073557	744170	2289371	454995	736150	25430584	2157928	936555	779721	2009	3.4B	F04	F
F04_06	73216	31285	343882	162841	248775	733473	151210	828591	139048	192175	5471733	582221	268827	200727	2009	3.4B	F04	F
F04_07	64469	28038	379795	87597	374222	1347936	245605	507345	103679	262341	9463822	430587	216436	110574	2009	3.4B	F04	F
F04_08	151200	58652	808829	163623	934508	2359625	446036	1252479	281972	422016	15082789	1122958	439292	459479	2009	3.4B	F04	F
F04_09	415841	270220	2240655	479598	3157205	6769501	1257089	3084641	887951	1865092	39719043	2210835	1540343	758081	2009	3.4B	F04	F
F04_10	291369	140522	2101806	545105	3178910	6135709	1238434	4702063	773618	1797921	39201025	4250837	1432248	1713738	2009	3.4B	F04	F
F04_11	85388	41914	509317	189670	781461	1870847	369289	817062	182810	483273	12634844	415292	296700	137292	2009	3.4B	F04	F
F04_12	217123	102934	1040810	297921	1735075	4368288	868607	1132042	431391	1079888	28376087	742992	889305	240637	2009	3.4B	F04	F
F04_13	166475	76004	926096	468286	1629503	2830665	593206	1973110	433564	921023	19490124	1411326	680164	596501	2009	3.4B	F04	F
F04_14	286304	131451	1312742	421873	2931501	5569972	1057815	1973629	665657	1675377	34375705	1254703	1518535	252182	2009	3.4B	F04	F
F04_15	308067	185078	1505245	307171	2727189	5920811	1214172	1754576	836340	1588775	36942376	1051741	1051279	272106	2009	3.4B	F04	F
F04_16	421204	234463	2497457	601932	3483915	7631040	1600180	4824634	1184335	2634025	46134226	1895173	1463307	494040	2009	3.4B	F04	F
F04_17	480785	255662	2749803	430340	2918322	7875101	1418218	3092988	1094015	2269651	45552898	2166627	1347417	649010	2009	3.4B	F04	F
F04_18	196594	56207	2431053	541803	1565061	3480861	731939	5778936	644383	872316	24320072	4202335	567765	1047118	2009	3.4B	F04	F
F04_19	705807	683232	4215377	652663	6501254	14628093	2560251	4411359	2502674	4149210	82435329	1805890	3322287	412973	2009	3.4B	F04	F
F05_02	51431	25659	446054	68016	438906	1654964	372257	791184	81943	84885	15286280	367073	184260	68100	2009	3.4B	F05	F
F05_03	201948	107628	2565622	948775	2681117	2347686	750340	6591031	231948	224804	21475523	4217119	727593	874418	2009	3.4B	F05	F
F05_04	197722	93350	1460978	378078	2900335	5041899	1327974	1840171	442008	1323149	38127235	924764	737048	247606	2009	3.4B	F05	F
F05_05	99826	63368	660025	343576	1305492	1130310	290163	1995325	380129	457133	8500316	1923784	300202	549535	2009	3.4B	F05	F
F05_06	213773	74022	1940906	735328	2276087	2391128	777928	5076173	310414	1067484	20120008	3824139	823038	1212321	2009	3.4B	F05	F
F05_07	302140	190426	2540625	940863	5660092	7061414	1922395	4094103	918376	669533	49373736	2826024	1848790	1039093	2009	3.4B	F05	F
F05_08	426480	347185	3489488	747768	6221413	8985478	2004254	5573679	1027272	877857	60799359	5401448	2934290	1397980	2009	3.4B	F05	F
F05_09	280438	261072	1716536	822883	4210821	4969928	1409815	3464253	928154	426657	38616495	1524484	1556488	534039	2009	3.4B	F05	F
F05_10	263235	150513	2024253	434482	4876660	6618175	1780313	2700717	837651	987568	49512550	1714206	2007840	701558	2009	3.4B	F05	F
F05_11	54440	27114	478330	91691	669152	1598401	407776	789651	106601	149943	13429376	306991	195277	51701	2009	3.4B	F05	F
F05_12	75840	20118	833058	268565	854564	1477490	395105	2689252	69263	307258	11811050	2360018	372124	646585	2009	3.4B	F05	F
F05_13	63778	19979	393042	224337	483293	854860	197503	1015693	110627	95317	7125007	1395982	139516	319022	2009	3.4B	F05	F
F05_14	324985	130263	3023904	623450	3749795	6314176	1624201	5829001	551661	928980	13149696	4205368	1877256	750355	2009	3.4B	F05	F
F05_15	235875	201143	1397209	406669	2910855	4318469	1249366	2164880	304137	1378836	32052732	919948	802987	278590	2009	3.4B	F05	F
F05_16	274082	119335	1768146	666705	1397777	4677422	897904	3275421	426497	1478626	31618429	1666311	913396	293505	2009	3.4B	F05	F
F05_17	352398	268407	2367393	457880	3678295	8813769	2050105	3047550	859756	2096187	57830312	1592138	1593217	290631	2009	3.4B	F05	F
F05_18	244987	169462	1667903	296526	2594968	6832216	1657768	2055269	495494	1637084	44873211	964725	1131796	172855	2009	3.4B	F05	F
F05_19	307375	132926	2347267	444381	3428185	6913746	1676579	2945377	532389	1701831	43830119	1731762	1123090	393135	2009	3.4B	F05	F
F06_03	98161	21965	1201303	278495	1029943	1129143	429723	2999453	120468	88733	8886937	2160877	100585	370263	2009	3.4B	F06	F
F06_04	20520	3469	292947	108557	292534	502623	169146	709826	36947	77387	3992614	744862	43863	207151	2009	3.4B	F06	F
F06_05	120888	31326	1350234	395393	2095759	2231871	825075	3346871	418765	167897	16423970	3551663	339007	955485	2009	3.4B	F06	F
F06_06	129430	154832	998631	253705	2474414	3115203	1036469	1132464	418553	370913	19942975	601839	534015	181181	2009	3.4B	F06	F
F06_07	323837	118794	4019592	1018343	2869832	2836785	1014410	10204958	384748	306524	20668128	8728628	650991	2378968	2009	3.4B	F06	F
F06_08	236340	103612	1841449	549847	4184091	3942134	1388014	2499683	748265	312930	29912682	1218182	711228	440162	2009	3.4B	F06	F
F06_09	272350	146012	2943168	653685	6187714	6215100	2266890	5116106	1106327	870650	45267936	4691924	1255227	1510312	2009	3.4B	F06	F
F06_10	317017	94491	3771993	828758	4613076	4225510	1541253	7389253	690481	463979	30546801	6373083	912437	1658258	2009	3.4B	F06	F
F06_11	339335	136791	2740204	561594	7278328	7428239	2617497	2908762	1308032	1057213	50559174	2054612	1316638	553725	2009	3.4B	F06	F
F06_12	114895	50256	1249404	423582	2488135	2674608	1035467	2409354	412003	266408	19341389	2370550	547024	793853	2009	3.4B	F06	F
F06_13	332618	111187	2704251	691221	3897283	4396508	1603709	4480595	605786	605397	30925932	4839996	898658	1883386	2009	3.4B	F06	F
F06_14	186215	49265	2314759	498568	2705808	3036542	1243654	5271375	314784	338217	22921208	5408020	614352	1466469	2009	3.4B	F06	F
F06_15	722779	350847	4935083	1187976	8934023	9135535	3114699	7401768	1527485	664730	59119412	5923987	2296146	2199017	2009	3.4B	F06	F
F06_16	87533	25980	599189	156284	652445	1320710	426579	989502	119716	57383	9604386	620939	94499	117687	2009	3.4B	F06	F
F06_17	141055	41196	1355557	182577	1099625	2448018	1093314	1993282	108332	190258	17747117	1287090	240663	324452	2009	3.4B	F06	F
F06_18	139118	56808	990338	291633	1114383	2386397	725822	1898974	192088	121984	16431552	888642	449311	103348	2009	3.4B	F06	F
F06_19	100763	23056	1107564	265036	532604	1136648	386822	2930541	230742	301235	8535445	2527355	147666	526619	2009	3.4B	F06	F
F11_2	347907	433221	2994450	1301685	5464365	7195148	1683438	7379489	330195	2373320	54929856	4995307	1527741	1524741	2009	3.4A	F11	F
F11_3	223147	96015	3511440	613492	2800693	4914058	1134027	7360440	392675	357995	39037945	5389833	998173	1191112	2009	3.4A	F11	F
F11_4	89436	33658	2294857	315122	1911891	4411004	1008064	4311054	591389	605118	34794345	2634284	548768	499257	2009	3.4A	F11	F
F11_5	320078	396801	5124071	1293482	4513184	3204590	1147178	13079785	182044	1564539	35006050	10349828	1531134	3205118	2009	3.4A	F11	F
F11_6	300607	211636	3159377	1329898	3794591	4758601	1119835	8143820	590830	886774	38429642	6783684	1157529	1880759	2009	3.4A	F11	F
F11_7	237973	271549	1781246	676945	3528254	5073345	1119713	3362202	683410	396783	41556883	2406860	1555176	877163	2009	3.4A	F11	F
F11_8	597131	705762	4140335	589962	9744525	13008273	3244662	5248030	1992395	3482732	92182987	3337060	3179088	960899	2009	3.4A	F11	F
F11_9	617035	701386	4873782	753030	10546205	11649959	3592582	7170549	2038701	2246148	112258430	5724140	3608557	1440735	2009	3.4A	F11	F
F11_10	450328	877739	4628736	1758713	5751097	5047714	1404190	14578735	1144467	2682565	46696041	11673389	1968921	3201924	2009	3.4A	F11	F
F11_11	344645	222630	2176582	345945	3482439	7611074	1485123	3234666	715370	1508963	54899625	2142938	1901741	695287	2009	3.4A	F11	F
F11_12	160959	66253	3558195	1122167	1388340	1172838	430113	12329653	440343	887392	12519214	12855002	862034	3249204	2009	3.4A	F11	F
F11_13	232454	195852	1774233	1174073	2714650	4150137	1004040	4371820	584176	280860	32960684	3108680	1200783	997664	2009	3.4A	F11	F
F11_14	308082	381650	2707411	1268969	6023598	6425138	1763848	6023370	934327	458290	52425703	4407406	1567008	1709961	2009	3.4A	F11	F
F11_15	281202	163020	2005934	597810	3352628	4929738	1217302	4268056	560322	1189364	40535221	3544478	1353303	1572611	2009	3.4A	F11	F
F11_16	167755	116043	1316423	601441	1461489	2366991	244775	2787279	382839	959305	25511409	1666010	472740	198426	2009	3.4A	F11	F
F11_17	194811	176987	1260808	311335	1150433	3541824	779381	2206171	336626	534778	27657874	2097686	834084	328652	2009	3.4A	F11	F
F11_18	227749	179364	1576432	493108	1792387	4564362	930088	3033549	546392	1230177	33832456	2587813	863151	254617	2009	3.4A	F11	F
F11_19	142014	85245	1374603	255871	1564127	4971168	1119603	2552025	523532	978980	36828415	2955016	468776	584441	2009	3.4A	F11	F
F12_2	239995	133516	1611619	207793	2365771	5852805	1383709	1975303	846190	1202828	40948090	1317197	475550	142746	2009	3.4A	F12	F
F12_3	91263	49052	1035519	263705	1787937	3509662	803164	2645904	897095	761016	27474777	2371497	416691	770693	2009	3.4A	F12	F
F12_4	268878	192495	1931808	1069963	3055797	4193420	982122	4132487	414586	1073388	34809888	3090667	924347	697471	2009	3.4A	F12	F
F12_5	446256	222330	2539016	374791	4366515	7495568	1891787	3500117	1414626	1862947	56237990	3518801	1153209	741107	2009	3.4A	F12	F
F12_6	40277	9446	276623	70471	296941	654615	238212	469817	159188	145708	7420086	422159	107491	53081	2009	3.4A	F12	F
F12_7	310755	168980	2347436	475445	3920615	6768614	1584160	4128332	1283491	1622745	48929652	4490468	1092908	1200388	2009	3.4A	F12	F
F12_8	713587	450180	6287898	1162550	13625489	19989076	5242137	10970133	5280476	5834086	147617642	7761927	3870971	2284479	2009	3.4A	F12	F
F12_9	167385	108447	1646522	715497	4004981	3457206	1137065	4757670	260578	2197852	33294815	3166936	952450	1200030	2009	3.4A	F12	F
F12_10	369682	149710	3227214	766066	3785489	7912018	1960308	8000420	2444056	2020415	58129690	9179152	1170621	2458633	2009	3.4A	F12	F
F12_11	374932	15068	3740058	812414	3718765	7758775	1966458	9448934	1295582	2011593	58132118	10424111	1191351	3235398	2009	3.4A	F12	F
F12_12	420418	568261	3941446	1904706	8175634	8044000	2444347	11075730	599762	3906582	67011428	8162335	2052372	2586344	2009	3.4A	F12	F
F12_13	374734	179655	3045519	653473	4576140	8012098	2007027	6134558	2443434	1097749	59552276	5207522	923233	1587323	2009	3.4A	F12	F
F12_14	463592	247500	3043148	622487	4818012	9895458	2261494	4440204	1983076	2337784	68009183	3611276	1064904	1246890	2009	3.4A	F12	F
F12_15	500906	230046	4414544	1087200	8159360	11729792	3349167	9182384	3960148	4004058	87940737	6453763	2021137	2387414	2009	3.4A	F12	F
F12_16	198168	87177	1398188	121250	2311921	4865523	2058226	1252466	1581098	555680	42025243	1221723	292348	38394	2009	3.4A	F12	F
F12_17	69217	23842	612752	125565	370865	1119483	311066	1386807	70415	213572	11597197	1765777	123381	174963	2009	3.4A	F12	F
F12_18	192152	97689	1215273	263518	1406885	3297645	990961	1691531	1117424	386678	28144788	1630164	497265	229529	2009	3.4A	F12	F
F12_19	409748	166995	2794468	370177	3289749	8352984	2215660	3920476	1871553	1708869	62008130	4684806	900207	549619	2009	3.4A	F12	F
3.4B_F3_1	193996	110436	1497823	149721	1043891	3227863	479387	2766372	308641	336843	20691232	3271222	365255	672469	2008	3.4B	3.4B_F3	F
3.4B_F3_2	171492	143133	1297741	73971	1350950	4384292	621163	1621035	225572	354939	27332033	2916747	299135	224319	2008	3.4B	3.4B_F3	F
3.4B_F3_3	267442	111309	1950568	86037	1743584	6029165	982046	2619851	252295	889789	40364787	2811737	538489	632425	2008	3.4B	3.4B_F3	F
3.4B_F3_4	152010	30186	1289952	99528	379452	1698912	343895	2040352	287069	114910	15545065	1801400	146606	184488	2008	3.4B	3.4B_F3	F
3.4B_F3_5	118079	43995	839342	49950	336882	1411589	281613	1159696	200772	142783	15195545	925854	932574	225033	2008	3.4B	3.4B_F3	F
3.4B_F3_6	305007	158379	1996177	119157	1838493	5861986	977780	2420561	548164	809472	38032808	1941474	560467	301668	2008	3.4B	3.4B_F3	F
3.4B_F3_7	185843	96218	1380811	91264	899476	3614698	574136	1977130	155971	455221	25783841	1786222	492213	242103	2008	3.4B	3.4B_F3	F
3.4B_F3_9	263597	105491	2408275	275964	1655340	6231413	1008548	3571768	364692	1073334	49511234	1721676	1168719	309292	2008	3.4B	3.4B_F3	F
3.4B_F3_10	298390	127210	1723251	77924	1396259	4767933	934408	2653836	305341	499961	29173659	2289299	1427469	413340	2008	3.4B	3.4B_F3	F
3.4B_F3_11	304277	212347	1970925	230429	2233074	6988321	1225592	2477170	521817	1079908	38604784	2465212	781441	1016769	2008	3.4B	3.4B_F3	F
3.4B_F3_12	320300	138191	1874446	233733	1793988	5116301	1033957	3095806	475677	1020705	33956610	2907669	829982	812009	2008	3.4B	3.4B_F3	F
3.4B_F3_13	474066	281105	2664777	146504	2374127	8097385	1351813	3296175	539775	1102646	46944907	2558034	1589835	513666	2008	3.4B	3.4B_F3	F
3.4B_F3_14	209263	88376	1219910	76082	798047	2915016	622016	1702030	187412	277937	24246260	1468439	768622	389088	2008	3.4B	3.4B_F3	F
3.4B_F3_15	213154	100712	1544681	103877	1151599	4017532	809124	2116091	160500	510051	30356513	1821100	1120922	229745	2008	3.4B	3.4B_F3	F
3.4B_F3_16	344848	132873	2330820	89880	1665853	6119743	1297316	2680346	435482	912461	48071016	2073347	1362998	373405	2008	3.4B	3.4B_F3	F
3.4B_F3_17	120208	65483	802165	60412	784282	2578462	498082	1589334	216362	188148	14894531	1751148	546265	457361	2008	3.4B	3.4B_F3	F
3.4B_F3_18	175144	78058	1039505	52463	809099	2745513	603072	1433657	331738	280348	18520580	1605209	633525	283562	2008	3.4B	3.4B_F3	F
3.4B_F3_19	390255	191493	2938234	335061	2183587	7310660	1231291	4830034	508531	1347013	50094227	428900	1412300	489707	2008	3.4B	3.4B_F3	F
3.4A_F3_1	112727	98728	638440	92554	730669	2211614	669183	1022601	166869	430052	16472604	1255276	221880	293432	2008	3.4A	3.4A_F3	F
3.4A_F3_2	155827	76056	1387013	172287	1549362	4109959	1149932	1866548	295643	980958	50142629	1350623	1831631	192475	2008	3.4A	3.4A_F3	F
3.4A_F3_3	777579	704280	4192846	435965	4999311	13599957	3159839	5563977	1001811	2800675	72593197	3866832	2085739	1186167	2008	3.4A	3.4A_F3	F
3.4A_F3_4	572006	505583	3522075	369944	3696192	9752983	2310568	5225496	701510	2006994	55474266	4972597	1828960	1127524	2008	3.4A	3.4A_F3	F
3.4A_F3_5	226856	220257	1602949	184202	1061572	4619005	1074116	2546640	174104	776951	30598771	2195096	583902	415164	2008	3.4A	3.4A_F3	F
3.4A_F3_6	389855	375224	2787700	179856	1875964	9775772	2057706	3787129	779667	1659996	58303264	2895849	1813966	955721	2008	3.4A	3.4A_F3	F
3.4A_F3_7	127254	65853	881873	108562	403575	1653543	537030	1856710	124451	502062	19800328	2379078	602527	434460	2008	3.4A	3.4A_F3	F
3.4A_F3_8	1160455	969478	7096910	825351	6858147	16799152	3656153	10513813	1144215	3798832	91657637	10700146	3829724	2703400	2008	3.4A	3.4A_F3	F
3.4A_F3_9	237827	172078	1697200	173100	1274264	3076061	925999	2887276	162875	719304	28626565	3292403	1135581	730325	2008	3.4A	3.4A_F3	F
3.4A_F3_10	279254	147649	2053287	213162	670683	2792863	705869	3687089	120472	459051	23859149	3553311	1122266	848693	2008	3.4A	3.4A_F3	F
3.4A_F3_11	145138	69921	1632653	172505	1905377	3360575	1184903	2525393	335476	1169059	46991185	1672047	2301896	419200	2008	3.4A	3.4A_F3	F
3.4A_F3_12	144411	270404	846795	168847	630684	1557034	437020	1806498	92126	323874	14606697	2555846	1131876	441193	2008	3.4A	3.4A_F3	F
3.4A_F3_13	997526	770027	7104263	1025045	6210653	14227699	3377787	12567468	1041981	3222618	82847995	11947649	2920860	3815339	2008	3.4A	3.4A_F3	F
3.4A_F3_14	1244658	868803	6145943	690426	5861909	13203509	3067972	7700880	824286	3090092	79252403	6642410	3502411	2066142	2008	3.4A	3.4A_F3	F
3.4A_F3_15	484812	382406	2686981	183417	2175489	8354870	1765203	2919668	349459	1386021	48567160	1973517	2627912	441190	2008	3.4A	3.4A_F3	F
3.4A_F3_16	154733	64070	960552	82257	171838	1218075	366049	1531045	106274	88134	15245212	1147639	1159571	257964	2008	3.4A	3.4A_F3	F
3.4A_F3_17	137643	37474	802107	90285	239659	910368	291305	1494358	155782	70852	11171151	1669642	1143568	468011	2008	3.4A	3.4A_F3	F
3.4A_F3_18	502102	427369	3471857	345776	3749591	10357663	2694051	5026456	548203	2094967	63082653	4534225	2338078	1000822	2008	3.4A	3.4A_F3	F
3.4A_F3_19	862379	830426	4451099	456831	4770193	12719079	3160854	5355001	641748	2647281	76877649	5149445	3197104	1015169	2008	3.4A	3.4A_F3	F
3.4A_F5_1	165712	91846	1639867	378964	881345	4670594	1170914	3069835	223799	699529	39178554	2436798	886252	736897	2008	3.4A	3.4A_F5	F
3.4A_F5_2	205350	97411	2032345	161047	1555790	5389792	1871096	2978804	354240	1181689	52617418	2976333	908717	720122	2008	3.4A	3.4A_F5	F
3.4A_F5_3	304668	203504	2934070	276152	3231896	9138901	2954060	4122522	429193	1959003	77191655	3132065	2311389	901102	2008	3.4A	3.4A_F5	F
3.4A_F5_4	405961	273781	1528037	277679	4074667	11270327	3350486	2040881	1306953	2100851	75701079	3785621	2112582	867679	2008	3.4A	3.4A_F5	F
3.4A_F5_5	168514	81890	1875130	166573	1520366	5356520	1619944	1494956	435740	1230338	50776491	1707984	1407134	396171	2008	3.4A	3.4A_F5	F
3.4A_F5_6	146183	46928	1474847	130118	578326	2764018	762513	2676312	163651	225657	29215546	1914325	818928	376142	2008	3.4A	3.4A_F5	F
3.4A_F5_7	556991	589217	3350213	308363	4806854	12354333	3034988	3855273	984340	2483670	85483991	2656066	2972573	698639	2008	3.4A	3.4A_F5	F
3.4A_F5_8	244440	123351	2151057	159434	1758046	5975192	2074030	2971485	529857	1141938	57982392	2231125	1851883	689479	2008	3.4A	3.4A_F5	F
3.4A_F5_9	451320	310862	3188891	379124	5143768	11124609	3680435	4018540	1218922	2578880	86329371	2819551	3050869	906608	2008	3.4A	3.4A_F5	F
3.4A_F5_10	523552	391258	3519684	364939	4708556	11297298	2836703	4325679	850893	2360057	88306988	3024183	3718451	706246	2008	3.4A	3.4A_F5	F
3.4A_F5_11	246463	100561	1969489	565829	1268378	3657840	1268349	4010157	229895	1036526	36996481	3439325	1430467	1336702	2008	3.4A	3.4A_F5	F
3.4A_F5_12	418656	231345	3276305	359236	3110673	8865142	2658649	4256136	581649	2019649	78108487	2590942	3131864	721873	2008	3.4A	3.4A_F5	F
3.4A_F5_13	379663	322349	3039922	240641	4124752	10174231	2908679	3864133	811206	2153373	81880882	3037606	3397293	661751	2008	3.4A	3.4A_F5	F
3.4A_F5_14	429387	157293	2709516	300619	1280376	4770527	1175411	3959221	305084	883107	42271939	2553333	2103597	548475	2008	3.4A	3.4A_F5	F
3.4A_F5_15	418325	268031	2922950	307135	3818199	9621403	2961844	3728074	1634280	2305240	82040728	1705299	3483963	438224	2008	3.4A	3.4A_F5	F
3.4A_F5_16	683974	529316	5375575	445823	5887082	16219082	4302687	7186845	1420360	3973531	126896162	4756131	7358286	1241092	2008	3.4A	3.4A_F5	F
3.4A_F5_17	484491	336934	3819047	365787	4563093	11492101	3533392	4629268	1121851	2842922	96614500	2774839	3539554	797703	2008	3.4A	3.4A_F5	F
3.4A_F5_18	124349	55440	1319338	193236	602656	2052339	537590	2746554	123793	152524	21574393	2440180	2130684	576199	2008	3.4A	3.4A_F5	F
3.4A_F5_19	255172	165615	2388959	238284	1543554	6448220	1760999	3824655	491821	1381776	58882968	2627107	2601239	570230	2008	3.4A	3.4A_F5	F
Key to column names
1st column =individual sample label				Patch(if applicable)_Colony_Individual				See GPS coordinates (S1 table) for details.
Columns labeled A1-A14				One of 14 peaks used in chemical analyses (e.g. NMDS, clustering analysis using centroid points of colonies)
Year				Year individual was collected (2008 or 2009)
Patch				Either 3-4A or 3-4B, two adjacent locations with relatively higher densities of Polyergus colonies, connected by a thin patch of livable habitat, approximately 360 meters apart
Colony				Colony codes. "P" indicated Polyergus colony and "F" indicates Formica colony (free-living)
EnsFree				Indicates whether Formica altipetens was enslaved by Polyergus or free-living
